# Supplementary material for: Tunable single-doped single-host full-color-emitting LaAlO3:Eu phosphorvia valence state-controlled means
Source: Royal Society of Chemistry journal article supplement (doi:10.1039/b814535k), 2008-11-26
Supplement: b814535k.pdf [file b814535k.pdf]

## Electronic Supplementary Information (ESI)

### 1.1 Experimental Procedure

A high temperature solid-state reaction method was employed to synthesize  $\text{LaAlO}_3$ : Eu white phosphor. Stoichiometric amounts of high purity (>99.99%) starting chemicals,  $\text{La}_2\text{O}_3$ ,  $\text{Al}_2\text{O}_3$ ,  $\text{Eu}_2\text{O}_3$  and  $\text{Li}_2\text{CO}_3$  in terms of chemical formula were mixed and ground manually with aid of some amount of ethanol to give a slurry. This slurry of starting materials was dispersed with an ultrasonicator for half an hour and then dried at  $80^\circ\text{C}$  for 12 hrs. Those dried powders were placed in a corundum crucible then fired at  $1400^\circ\text{C}$  for 4 hrs under a reductive atmosphere of  $\text{H}_2$ 8vol.%/N<sub>2</sub>92vol.%, except those samples in Fig.3 directly fired in air. Phases and crystal structure of the as-received phosphors powders were examined via X-ray diffraction (XRD, Rigaku D/max-2500/pc,  $\lambda_{\text{Cu-K}\alpha}=1.54062\text{nm}$ , Japan). Photoluminescence spectra of samples were recorded by a fluorescence spectrometer (Hitachi F-4500, Japan). And the colourometry parameters were measured by PMS-50 Plus UV-Vis-near IR Spectro-photocolorimeter (Everfine, China).

### 1.2 XRD Patterns

X-ray diffraction patterns of  $\text{La}_{0.98}\text{AlO}_3$ :  $\text{Eu}_{0.02}$  is represented in Fig.ESI-1. All of the diffraction peaks are agreeable well with JCPDS card (No.31-0022), indicating that phase-pure perovskite type host structure in a single-phase composition has been obtained.

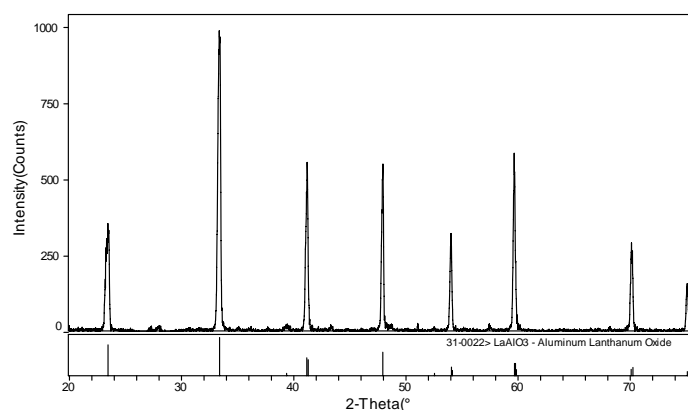

Fig.ESI-1. X-ray diffraction pattern of  $\text{La}_{0.98}\text{AlO}_3$ :  $\text{Eu}_{0.02}$

### 1.3 Photographs of luminous samples irradiated with 365 nm UV light

The photographs in Fig. ESE-2, were obtained with a digital camera as samples were excited by 365 nm UV light. These images correspond to those CIE points in Fig.6 in the manuscript, respectively, to show a sensitive effect of  $\text{Li}^+$  to PL and the evolution of CCT and CIE vs. amount variation of  $\text{Li}^+$  added to the  $\text{LaAlO}_3$  host. Image (2) in

Fig. ESE-2, i.e. point 2 ( $x=0.3598, 0.2985$ ) in Fig.6 is close to equal-energy white ( $x=0.33, y=0.33$ ), which is a starting point, as we expected, for us to trace different routes to achieve white light with varied CCT and CIE quality for different purposes, as long as energy transfer between  $\text{Eu}^{2+}$  and  $\text{Eu}^{3+}$  can be adjusted efficiently.

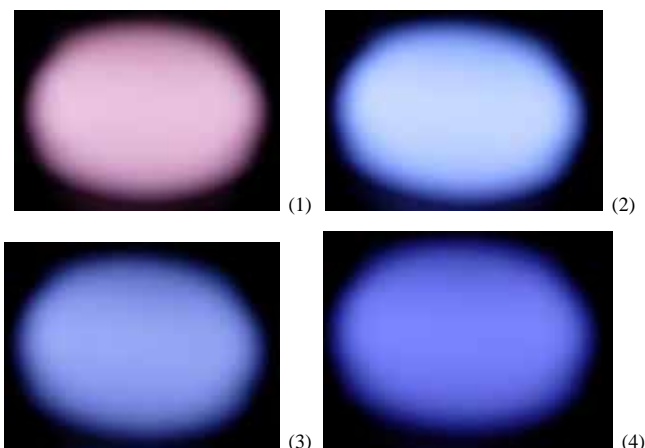

Fig. ESE-2 The photographs of  $\text{La}_{0.98}\text{AlO}_3:\text{Eu}_{0.02}\text{Li}_m$  samples irradiated with 365 UV light  
 (1) $m=0.00$ , (2) $m=0.02$ , (3) $m=0.04$ , (4) $m=0.06$

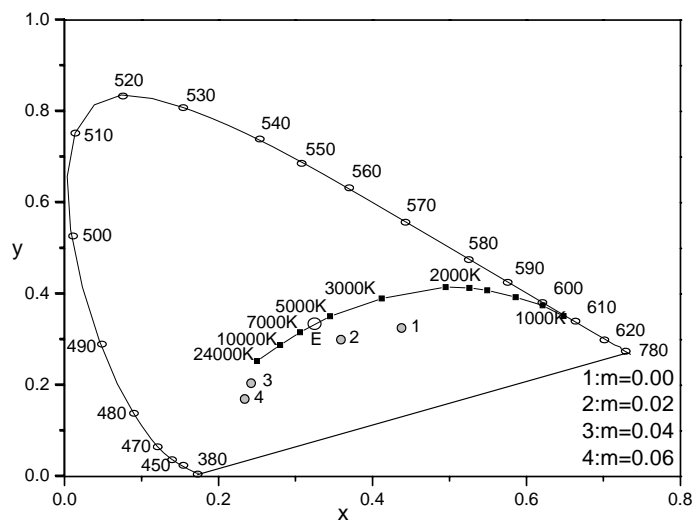

Fig.6. Evolutions of CCT and CIE chromaticity coordinates of  $\text{La}_{0.98}\text{AlO}_3:\text{Eu}_{0.02}\text{Li}_m^+$  vary with amount of added  $\text{Li}^+$  ion ( $m=0.00, 0.02, 0.04, 0.06$ )
